# Supplementary material
Source: ML conference proceedings conference paper supplement (https://openreview.net/forum?id=oSrM_jG_Ng)
Supplement: supplementary_material [file attachment]

# THE BENEFIT OF DISTRACTION: DENOISING REMOTE VITALS MEASUREMENTS USING INVERSE ATTENTION: SUPPLEMENTARY MATERIALS

**Anonymous authors**

Paper under double-blind review

## 1 EVALUATION METRICS

To evaluate the performance of our proposed approach we used the following four standard error measures (MAE, RMSE, Correlation, SNR), and we defined a new measure (Waveform MAE) to measure the waveform dynamics.

**Mean absolute error (MAE):**

$$\text{MAE} = \frac{\sum_{i=1}^N |R_i - \hat{R}_i|}{N} \quad (1)$$

where  $N$  is the total number of time windows,  $R_i$  is the ground truth heart rate (HR) measured with a contact sensor for each 30 second time window and  $\hat{R}_i$  is the estimated HR from the video.

**Root Mean Square Error (RMSE):**

$$\text{RMSE} = \sqrt{\frac{\sum_{i=1}^N (R_i - \hat{R}_i)^2}{N}} \quad (2)$$

**Pearsons Correlation Coefficient ( $\rho$ ):** computed between HR estimates from each time window  $\hat{R} = [\hat{R}(1), \dots, \hat{R}(N)]$  and the ground truth HR measurements  $R = [R(1), \dots, R(N)]$ .

**Signal-to-noise ratio (SNR):** calculated as the ratio of the area under the curve of the power spectrum around the first and the second harmonic of the ground truth HR frequency divided by the rest of the power spectrum within the physiological range of 42 to 240 bpm De Haan & Jeanne (2013):

$$\text{SNR} = 10 \log_{10} \left( \frac{\sum_{42}^{240} ((U_t(f)S(f))^2)}{\sum_{42}^{240} ((1 - U_t(f))S(f))^2} \right) \quad (3)$$

where  $S$  is the power spectrum of the estimated iPPG signal,  $f$  is the frequency in beats per minute (BPM) and  $U_t(f)$  is equal to one for frequencies around the first and second harmonic of the ground truth HR (HR-6 bpm to HR+6 bpm and 2\*HR-6 bpm to 2\*HR+6 bpm), and 0 everywhere else.

**Waveform Mean Absolute Error (WMAE):**

$$\text{WMAE} = \frac{\sum_{i=1}^N |W_i - \hat{W}_i|}{N} \quad (4)$$

where  $W_i$  is the ground truth pulse waveform obtained with the contact sensor for each 30 second time window and  $\hat{W}_i$  is the estimated pulse waveform from the video.

## 2 BASELINE METHODS

We compared the performance of our proposed approach to state-of-the-art supervised method using a convolutional attention network (CAN) and three unsupervised methods described below.

For the CHROM, ICA and POS methods face detection was first performed using MATLAB's face detection (`vision.CascadeObjectDetector()`). This was fixed for all methods, to avoid the influence of the face detector on performance. For the CAN method following the implementation in (Chen & McDuff, 2018) we did not use face detection but rather we passed the full frame to the network after cropping the center portion to make the frame a square with  $W=H$ .

**CHROM** (De Haan & Jeanne, 2013). This method uses a linear combination of the chrominance signals obtained from the RGB video. The  $[x_R, x_G, x_B]$  signals are filtered using a zero-phase, 3rd-order Butterworth bandpass filter with pass-band frequencies of [0.7 2.5] Hz. Following this, a moving window method of length 1.6 seconds (with overlapping windows and a step size of 0.8 seconds) is applied. Within each window the color signals are normalized by dividing by their mean value to give  $[\bar{x}_r, \bar{x}_g, \bar{x}_b]$ . These signals are bandpass filtered using zero-phase forward and reverse 3rd-order Butterworth filters with pass-band frequencies of [0.7 2.5] Hz. The filtered signals  $[y_r, y_g, y_b]$  are then used to calculate  $S_{win}$ :

$$S_{win} = 3(1 - \frac{\alpha}{2})y_r - 2(1 + \frac{\alpha}{2})y_g + \frac{3\alpha}{2}y_b \quad (5)$$

Where  $\alpha$  is the ratio of the standard deviations of the filtered versions of A and B:

$$A = 3y_r - 2y_g \quad (6)$$

$$B = 1.5y_r + y_g - 1.5y_b \quad (7)$$

The resulting outputs are scaled using a Hanning Window and summed with the subsequent window (with 50% overlap) to construct the final blood volume pulse (BVP) signal.

**ICA** (Poh et al., 2010). This approach involves spatial averaging the pixels by color channel in the region of interest (ROI) for each frame to form time varying signals  $[x_R, x_G, x_B]$ . Following this, the observation signals are detrended. A Z-transform is applied to each of the detrended signals. The Independent Component Analysis (ICA) (JADE implementation) is applied to the normalized color signals.

**POS** (Wang et al., 2017). The intensity signals  $[x_R, x_G, x_B]$  are computed. A moving window of length 1.6 seconds (with overlapping windows and with a step size of one frame), is applied. For each time window, the signal is divided by its mean to give  $[\bar{x}_r, \bar{x}_g, \bar{x}_b]$ . Following this,  $X_s$  and  $Y_s$  are calculated where:

$$X_s = \bar{x}_g - \bar{x}_b \quad (8)$$

$$Y_s = -2\bar{x}_r + \bar{x}_g + \bar{x}_b \quad (9)$$

$X_s$  and  $Y_s$  are then used to calculate  $S_{win}$ , where:

$$S_{win} = X_s + \frac{\sigma(X_s)}{\sigma(Y_s)}Y_s \quad (10)$$

The resulting outputs of the window-based analysis are used to construct the final BVP signal in an overlap add fashion.

**CAN** (Chen & McDuff, 2018) Supervised convolutional attention neural network described in detail in the main text (Chen & McDuff, 2018). Following the implementation in that paper we did not use face detection but rather we pass the full frame to the network after cropping the center portion to make the frame a square with  $W=H$ .

**Signal Pre-processing.** We bandpass filtered the physiological signals and noise estimates to 0.7 Hz - 2.5 Hz range and detrended them (Tarvainen et al., 2002) before feeding them into the LSTM. We set the detrending parameter  $\lambda$  for each dataset based on the video frame rate ( $\lambda = 500$  for AFRL (Estepp et al., 2014) and  $\lambda = 50$  for MMSE-HR (Zhang et al., 2016) and MR-NIRP (Nowara et al., 2018)). We normalized the signals and noise estimates with AC/DC normalization by subtracting the temporal mean and dividing by the temporal standard deviation computed for each video.

We additionally normalized the amplitude range of the signals, noise estimates and the ground truth signals to -1 and 1. Finally, we resampled all sequences to 30 fps.

**Statistical Significance.** We computed F-tests to verify that our errors had significantly lower variance (spread) than the baselines. For AFRL and MR-NIRP which had longer videos, we computed the error metrics for each video, and for the shorter MMSE-HR, we computed them for all time windows in the dataset. In addition to lower mean errors, for all datasets our approach led to significantly lower spread in the MAE and RMSE. AFRL (300 videos): MAE:  $F = 0.54$ ,  $p < 0.01$ , RMSE:  $F = 0.56$ ,  $p < 0.01$ , MMSE-HR (131 windows): MAE:  $F = 0.26$ ,  $p < 0.01$ , RMSE:  $F = 3.92$ ,  $p < 0.01$ , MR-NIRP (15 videos): MAE  $F = 7.94$ ,  $p < 0.01$ , RMSE  $F = 6.63$ ,  $p < 0.01$ .

### 3 COMPARISON OF NOISE ESTIMATION

**Noise Signal Definition.** We compared the performance of our proposed denoising framework with noise channels computed from a single red, green or blue camera channel to using all three R, G, B channels. We hypothesized that the blue channel might be the best one for the noise representation for the physiological signals because the hemoglobin present in blood has the lowest absorption in the blue light spectrum and its intensity variations would be least related to blood flow. Conversely, the green channel could also be a useful noise representation, because it would contain information most similar to the physiological signals since the hemoglobin has the largest absorption in the green spectrum. However, we found that there is not a large difference between using any one of the single channels or all three channels. We report the detailed results in Table 1 on the AFRL dataset (Estepp et al., 2014).

**Inverse Mask Definition.** We also compared computing noise using a binary and a continuous inverse attention mask. The continuous mask was computed as a matrix of continuous values in which each element of the inverse mask  $M$ ,  $M_{i,j}$ , was  $1 - A_{i,j}$  where  $A$  is the attention mask weights normalized from 0 to 1. The binary mask was computed by thresholding these values, where  $A'_{i,j} = 1$ , if  $A_{i,j} > T$ , where  $T$  is a threshold from 0 to 1. We found that we obtained comparable results with the binary and continuous masks as shown in Table 1.

Table 1: Participant independent performance of pulse measurement on AFRL (Estepp et al., 2014). There was no systematic benefit of using R, G, B or RGB inputs or using the binary vs. continuous mask. We used the binary mask with RGB inputs for the results shown in the main paper.

| Method                          | AFRL (All Tasks) (Estepp et al., 2014) |             |             |             |             |
|---------------------------------|----------------------------------------|-------------|-------------|-------------|-------------|
|                                 | MAE                                    | RMSE        | SNR         | $\rho$      | WMAE        |
| Ours (LSTM RGB binary mask)     | 2.25                                   | 5.68        | 6.44        | 0.87        | 0.21        |
| Ours (LSTM Red Binary Mask)     | 2.09                                   | 5.19        | 6.70        | <b>0.89</b> | 0.21        |
| Ours (LSTM Green Binary Mask)   | <b>2.04</b>                            | <b>5.11</b> | <b>6.84</b> | <b>0.89</b> | 0.21        |
| Ours (LSTM Blue Binary Mask)    | 2.18                                   | 5.27        | 6.59        | 0.88        | 0.21        |
| Ours (LSTM RGB Continuous Mask) | 2.10                                   | 5.61        | <b>7.11</b> | 0.87        | <b>0.20</b> |

**Different Distraction Regions.** We compared separately using noise estimates from distraction regions closer to the face (“Center” of the frames) and further from the face (“Edges” of the frames). We used an LSTM model trained on all ignored regions for this experiment. When motion was small, all regions contributed similarly to denoising. But when there was large head motion, regions close to the head (center of the frames) helped the most. See Table 2.

Table 2: Different Distraction Regions on AFRL (Estepp et al., 2014)

| Method | MAE         |             |             |             |             |             | BVP SNR      |             |             |             |             |              |
|--------|-------------|-------------|-------------|-------------|-------------|-------------|--------------|-------------|-------------|-------------|-------------|--------------|
|        | 1           | 2           | 3           | 4           | 5           | 6           | 1            | 2           | 3           | 4           | 5           | 6            |
| Edges  | <b>1.07</b> | <b>2.10</b> | 1.92        | 2.10        | 2.68        | 8.74        | <b>10.52</b> | 7.23        | 8.59        | 6.04        | 3.07        | -5.83        |
| Center | 1.08        | 2.11        | <b>1.75</b> | <b>2.00</b> | <b>2.43</b> | <b>6.53</b> | 10.50        | <b>7.28</b> | <b>8.72</b> | <b>6.33</b> | <b>3.89</b> | <b>-4.47</b> |

**Effect of Glasses.** We compared the performance of our denoising approach and the baseline CAN method on subjects with and without glasses. We found that our method offers largest improvements on subjects with glasses, as shown in Table 3. However, the attention masks output by CAN on subjects with and without glasses were comparable, as shown in Figure 1. Nine of the 25 subjects in the AFRL dataset were wearing glasses. No subjects in the MMSE-HR or MR-NIRP datasets were wearing glasses.

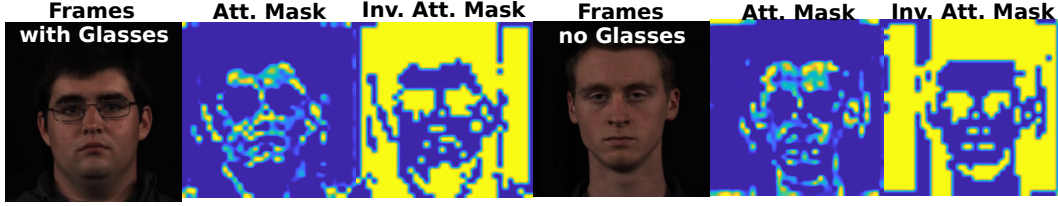

Figure 1: Comparison of attention masks and inverse attention masks on a video with and without glasses.

Table 3: Effect of Glasses on AFRL (Estepp et al., 2014)

| Method                   | MAE         | RMSE        | SNR         | $\rho$      | WMAE        |
|--------------------------|-------------|-------------|-------------|-------------|-------------|
| Ours (LSTM) with Glasses | <b>2.17</b> | <b>4.55</b> | <b>7.33</b> | <b>0.87</b> | 0.21        |
| CAN with Glasses         | 3.33        | 6.56        | 3.80        | 0.76        | 0.24        |
| Ours (LSTM) no Glasses   | 2.55        | 5.79        | 4.68        | 0.59        | <b>0.20</b> |
| CAN no Glasses           | 2.57        | 5.13        | 2.50        | 0.66        | 0.22        |

## REFERENCES

- Weixuan Chen and Daniel McDuff. Deepphys: Video-based physiological measurement using convolutional attention networks. In *Proceedings of the European Conference on Computer Vision (ECCV)*, pp. 349–365, 2018.
- Gerard De Haan and Vincent Jeanne. Robust pulse rate from chrominance-based rppg. *IEEE Transactions on Biomedical Engineering*, 60(10):2878–2886, 2013.
- Justin R Estepp, Ethan B Blackford, and Christopher M Meier. Recovering pulse rate during motion artifact with a multi-imager array for non-contact imaging photoplethysmography. In *2014 IEEE International Conference on Systems, Man, and Cybernetics (SMC)*, pp. 1462–1469. IEEE, 2014.
- Ewa Magdalena Nowara, Tim K Marks, Hassan Mansour, and Ashok Veeraraghavan. Sparseppg: towards driver monitoring using camera-based vital signs estimation in near-infrared. In *2018 IEEE/CVF Conference on Computer Vision and Pattern Recognition Workshops (CVPRW)*, pp. 1353–135309. IEEE, 2018.
- Ming-Zher Poh, Daniel McDuff, and Rosalind W Picard. Non-contact, automated cardiac pulse measurements using video imaging and blind source separation. *Optics express*, 18(10):10762–10774, 2010.
- Mika P Tarvainen, Perttu O Ranta-Aho, and Pasi A Karjalainen. An advanced detrending method with application to hrv analysis. *IEEE Transactions on Biomedical Engineering*, 49(2):172–175, 2002.
- Wenjin Wang, Albertus C den Brinker, Sander Stuijk, and Gerard de Haan. Algorithmic principles of remote ppg. *IEEE Transactions on Biomedical Engineering*, 64(7):1479–1491, 2017.
- Zheng Zhang, Jeff M Girard, Yue Wu, Xing Zhang, Peng Liu, Umur Ciftci, Shaun Canavan, Michael Reale, Andy Horowitz, Huiyuan Yang, et al. Multimodal spontaneous emotion corpus for human behavior analysis. In *Proceedings of the IEEE Conference on Computer Vision and Pattern Recognition*, pp. 3438–3446, 2016.
